# Supplementary material for: A novel phenylacetylene-indolium fluorophore for detection of cyanide by the naked eye
Source: Royal Society of Chemistry journal article supplement (doi:10.1039/c5ra10273a), 2015-01-01
Supplement: c5ra10273a1.pdf [file c5ra10273a1.pdf]

## Supporting Information

# Novel phenylacetylene-indolium fluorophore for naked eye detection of cyanide

Nakorn Niamnont<sup>a,\*</sup>, Apiwat Promchat<sup>b</sup>, Chutima Siangma<sup>a</sup>,

Chuenjai Pramaulpornsatit<sup>a</sup>, Mongkol Sukwattanasinitt<sup>b</sup>

<sup>a</sup> *Department of Chemistry, Faculty of Science, King Mongkut's University of Technology Thonburi, Bangkok 10140, Thailand.*

<sup>b</sup> *Organic Synthesis Unit, Department of Chemistry, Faculty of Science and Nanotec-CU Center of Excellence on Food and Agriculture, Chulalongkorn University, Bangkok 10330, Thailand.*

[nakorn.nia@kmutt.ac.th](mailto:nakorn.nia@kmutt.ac.th)

### Contents

|                                                                                                                                                                                            | <b>Page</b> |
|--------------------------------------------------------------------------------------------------------------------------------------------------------------------------------------------|-------------|
| 1. Synthetic procedures of <b>2</b>                                                                                                                                                        | S2          |
| 2. The photophysical properties of <b>2</b>                                                                                                                                                | S3          |
| 3. Emission spectra ratios ( $I/I_0$ ) of <b>2</b> (50 $\mu$ M) in the presence of $\alpha$ -, $\beta$ -, and $\gamma$ cyclodextrins (400 $\mu$ M) and cyanide ion (100 $\mu$ M) and image | S4          |
| 4. Reaction-time profile of probe <b>2</b> for $\text{CN}^-$ detection                                                                                                                     | S5          |
| 5. Calibration curve of <b>2</b> for cyanide ions detection                                                                                                                                | S5          |
| 6. The cross checked cyanide addition to probe <b>2</b> by using EI-HRMS                                                                                                                   | S6          |

1. Spectroscopic data ( $^1\text{H}$  and  $^{13}\text{C}$ -NMR) and Mass spectrum.

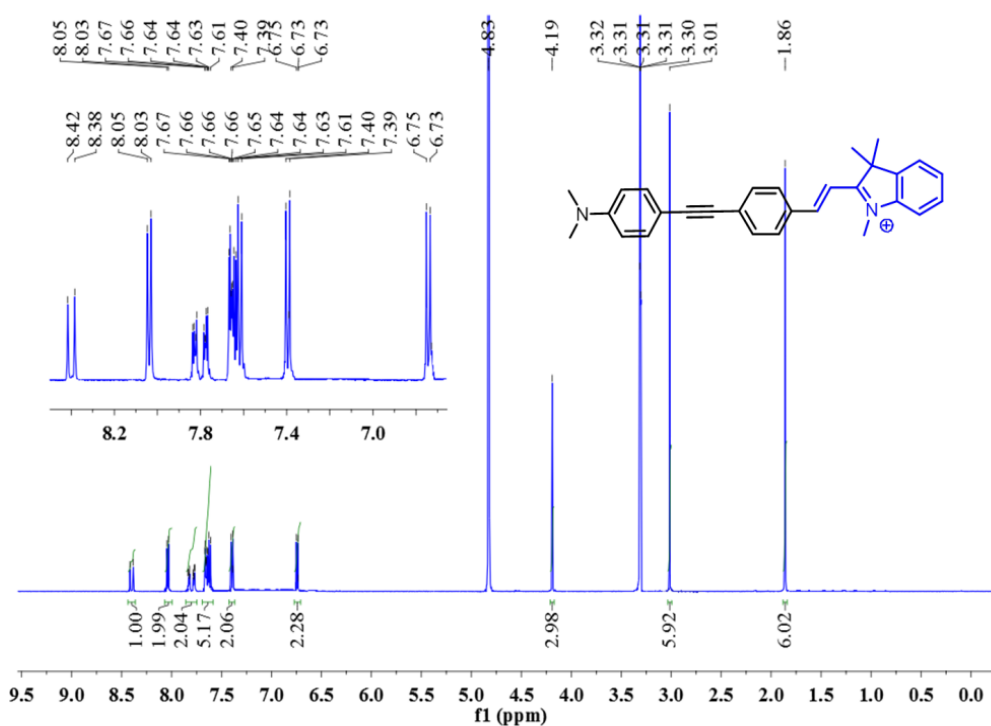

Figure S1.  $^1\text{H}$ -NMR spectrum of **2** in Acetone- $d_6$  (500 MHz).

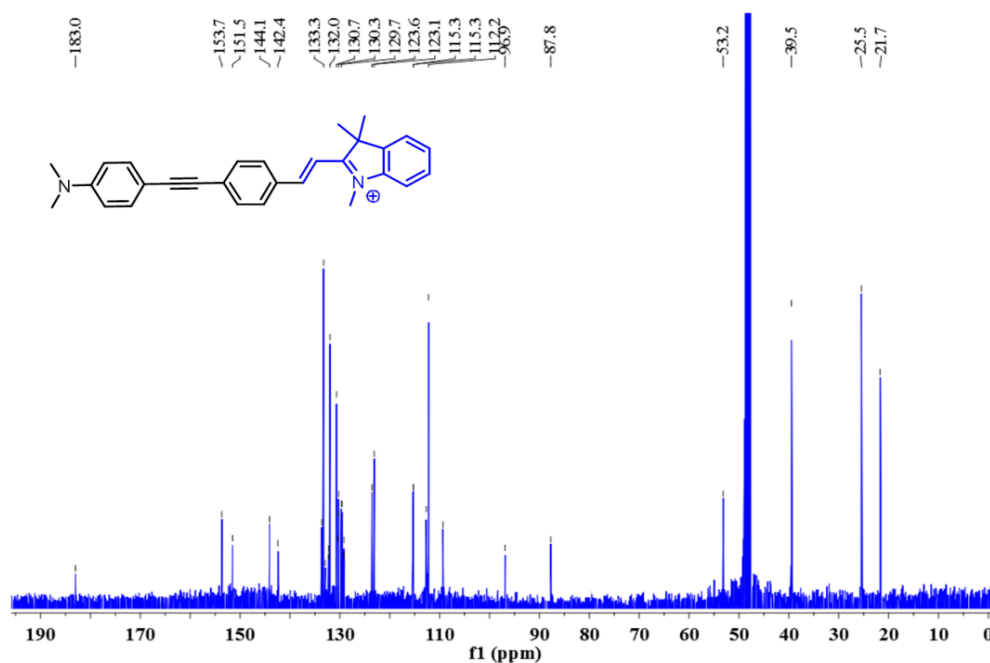

Figure S2.  $^{13}\text{C}$ -NMR spectrum of **2** in Acetone- $d_6$  (500 MHz).

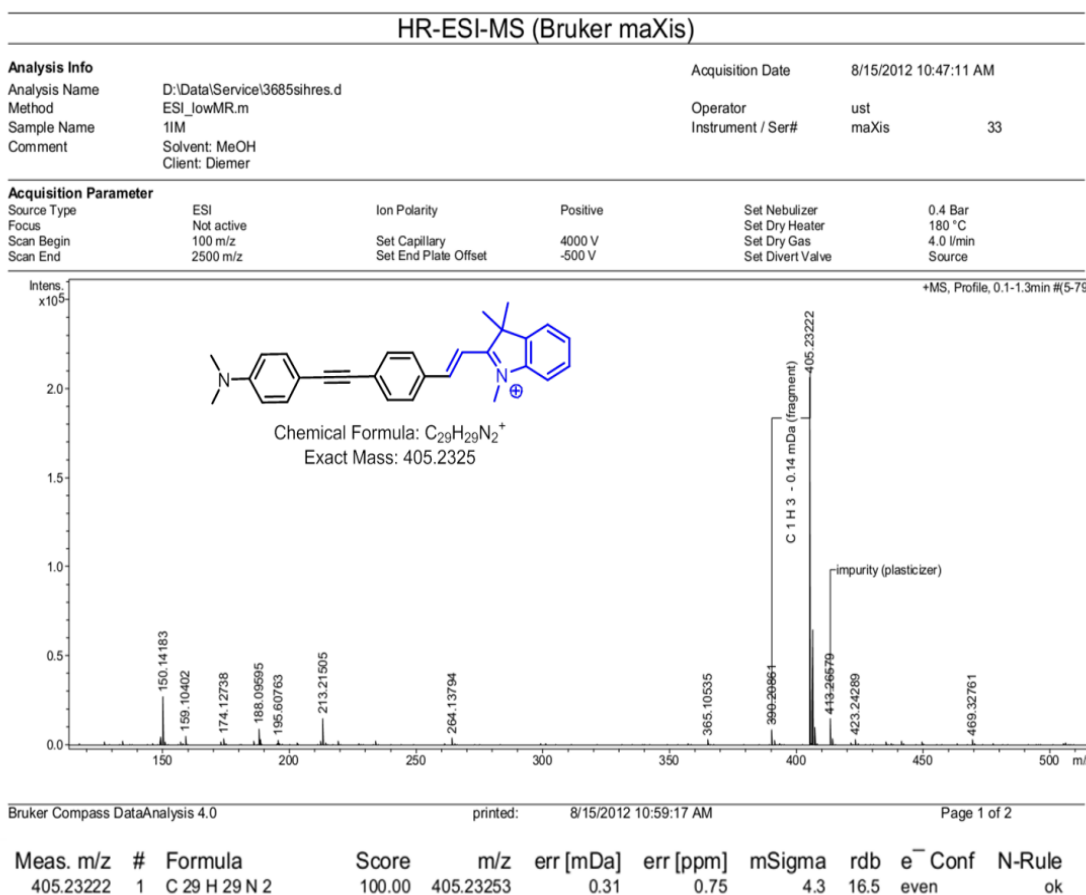

**Figure S3.** HRMS spectrum of **2**.

| Compound                  | Absorption            |                                                        | Emission                   |                              |
|---------------------------|-----------------------|--------------------------------------------------------|----------------------------|------------------------------|
|                           | $\lambda_{\max}$ (nm) | $\log \epsilon$<br>(M <sup>-1</sup> cm <sup>-1</sup> ) | $\lambda_{\text{em}}$ (nm) | $\Phi_{\text{F}}^{\text{a}}$ |
| <b>2</b>                  | 450                   | 4.29                                                   | 595                        | 0.025                        |
| <b>2 + CN<sup>-</sup></b> | 360                   | 2.58                                                   | 450                        | 0.34                         |

Quinine sulfate in 0.1 M H<sub>2</sub>SO<sub>4</sub> ( $\Phi_{\text{F}} = 0.54$ ) was used as standard

**Table S1.** Photophysical properties of **2** mixed cyclodextrins (400  $\mu\text{M}$ ) in HEPES (10 mM, pH 7.4)

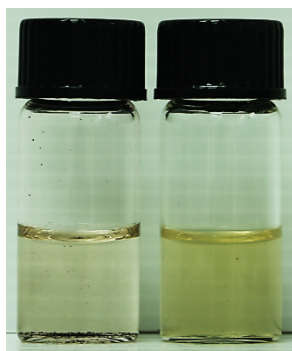

**Figure S4.** Image of **2** only (100  $\mu\text{M}$ ) (left) and **2** mixed  $\alpha$ -cyclodextrins (800  $\mu\text{M}$ ) in HEPES buffer pH 7.4.

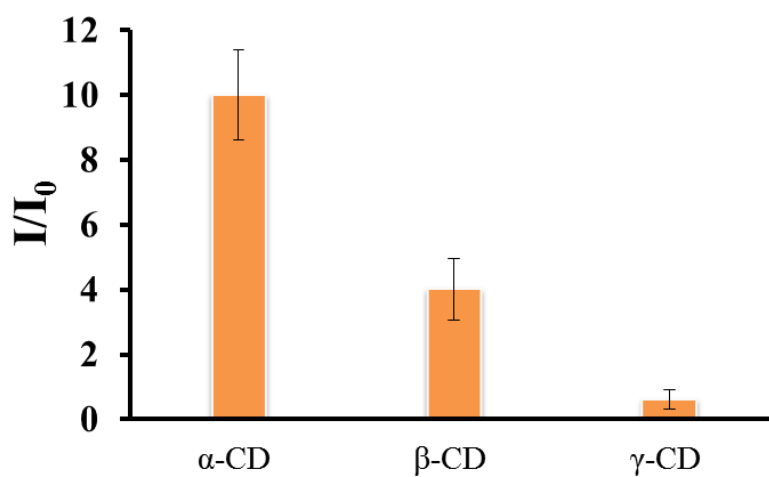

**Figure S5.** Emission spectra ratios ( $I/I_0$ ) of **2** (10  $\mu\text{M}$ ) in the presence of  $\alpha$ -,  $\beta$ -, and  $\gamma$  cyclodextrins (400  $\mu\text{M}$ ) and cyanide ion (100  $\mu\text{M}$ ) in HEPES buffer pH 7.4, excited at 360 nm.

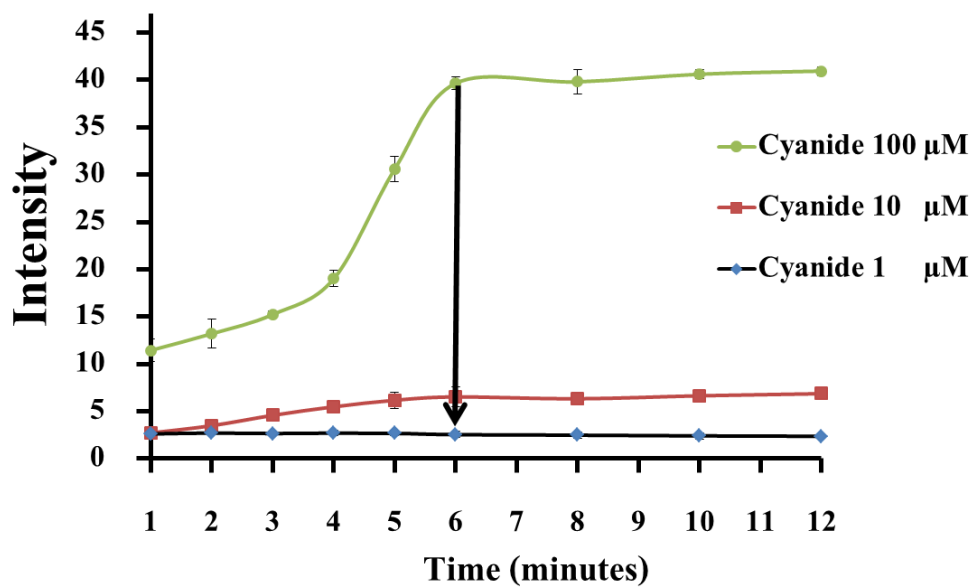

**Figure S6.** Reaction-time profile of probe **2** (50  $\mu\text{M}$ ) mixed cyclodextrins (400  $\mu\text{M}$ ) in HEPES buffer pH 7.4 in the presence of different concentrations of  $\text{CN}^-$ .

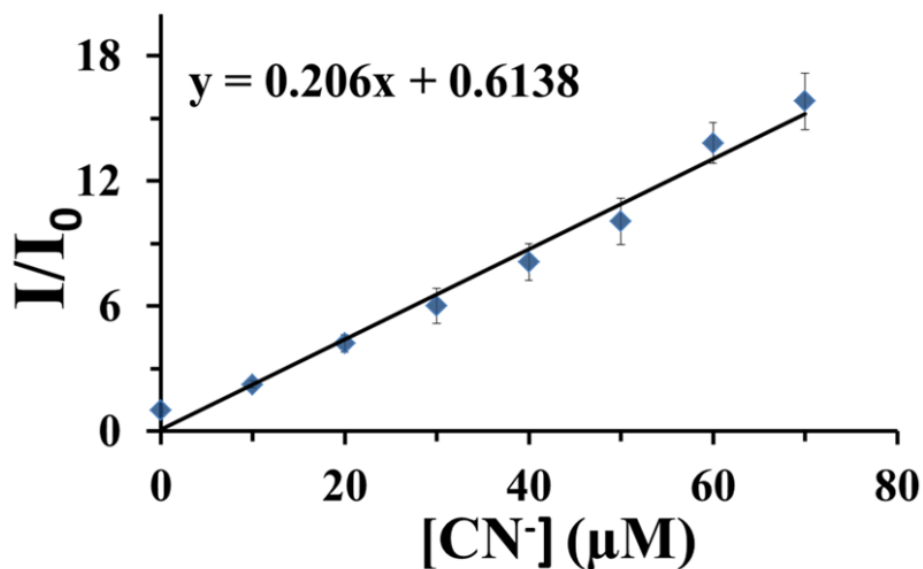

**Figure S7.** The corresponding calibration curve of **2** (50  $\mu\text{M}$ ) mixed cyclodextrins (400  $\mu\text{M}$ ) in the presence of cyanide ions at various concentrations.

## Mass Spectrum List Report

### Analysis Info

Analysis Name OSNN580708002.d  
 Method Tune\_low\_POS\_Natee20130403.m  
 Sample Name N2  
 N2

Acquisition Date 7/8/2015 3:02:07 PM  
 Operator Administrator  
 Instrument micrOTOF 72

### Acquisition Parameter

|             |          |                |          |                    |        |
|-------------|----------|----------------|----------|--------------------|--------|
| Source Type | ESI      | Ion Polarity   | Positive | Set Corrector Fill | 79 V   |
| Scan Range  | n/a      | Capillary Exit | 180.0 V  | Set Pulsar Pull    | 406 V  |
| Scan Begin  | 50 m/z   | Hexapole RF    | 150.0 V  | Set Pulsar Push    | 388 V  |
| Scan End    | 3000 m/z | Skimmer 1      | 45.0 V   | Set Reflector      | 1300 V |
|             |          | Hexapole 1     | 24.3 V   | Set Flight Tube    | 9000 V |
|             |          |                |          | Set Detector TOF   | 1910 V |

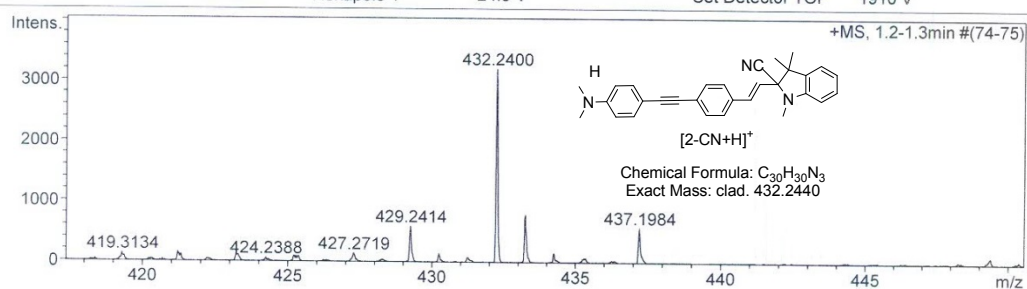

| #  | m/z      | I    | I %   | S/N   | FWHM   | Res.  |
|----|----------|------|-------|-------|--------|-------|
| 1  | 418.3732 | 34   | 1.1   | 4.0   | 0.0539 | 7755  |
| 2  | 419.3134 | 125  | 3.9   | 15.8  | 0.0747 | 5616  |
| 3  | 420.6841 | 40   | 1.3   | 5.1   | 0.0131 | 32077 |
| 4  | 421.2404 | 115  | 3.6   | 14.6  | 0.1354 | 3110  |
| 5  | 421.2404 | 115  | 3.6   | 14.6  | 0.1354 | 3110  |
| 6  | 424.2388 | 57   | 1.8   | 7.2   | 0.0527 | 8049  |
| 7  | 426.2377 | 19   | 0.6   | 2.4   | 0.0651 | 6545  |
| 8  | 426.3377 | 20   | 0.6   | 2.5   | 0.1069 | 3987  |
| 9  | 427.2719 | 131  | 4.1   | 16.7  | 0.1068 | 4000  |
| 10 | 428.2637 | 39   | 1.2   | 5.0   | 0.1185 | 3614  |
| 11 | 429.2414 | 584  | 18.3  | 74.1  | 0.0679 | 6321  |
| 12 | 430.2406 | 132  | 4.1   | 16.7  | 0.0675 | 6374  |
| 13 | 431.2400 | 73   | 2.3   | 9.3   | 0.1116 | 3865  |
| 14 | 432.2400 | 3198 | 100.0 | 406.4 | 0.0650 | 6650  |
| 15 | 433.2454 | 781  | 24.4  | 99.3  | 0.0739 | 5866  |
| 16 | 434.2461 | 141  | 4.4   | 17.9  | 0.0594 | 7307  |
| 17 | 435.3062 | 69   | 2.2   | 8.8   | 0.1516 | 2872  |
| 18 | 436.3295 | 29   | 0.9   | 3.7   | 0.1310 | 3331  |
| 19 | 437.1984 | 574  | 17.9  | 73.1  | 0.0692 | 6314  |

**Figure S8.** The cross checked cyanide addition to probe 2 by using EI-HRMS.
